# Supplementary material
Source: PubMed Central journal article supplement (PMC2682467)

## Supplemental Figures

**Figure 1S:** Location of the 4 CNVs studied from the Database of Genomic Variants at the time of the study. Genes PKLR, HCN3, CLK2, and SCAMP3 are circled; primer locations are provided for the four real time assays. Exact locations are provided in the text.

## Location of CNV's Studied:

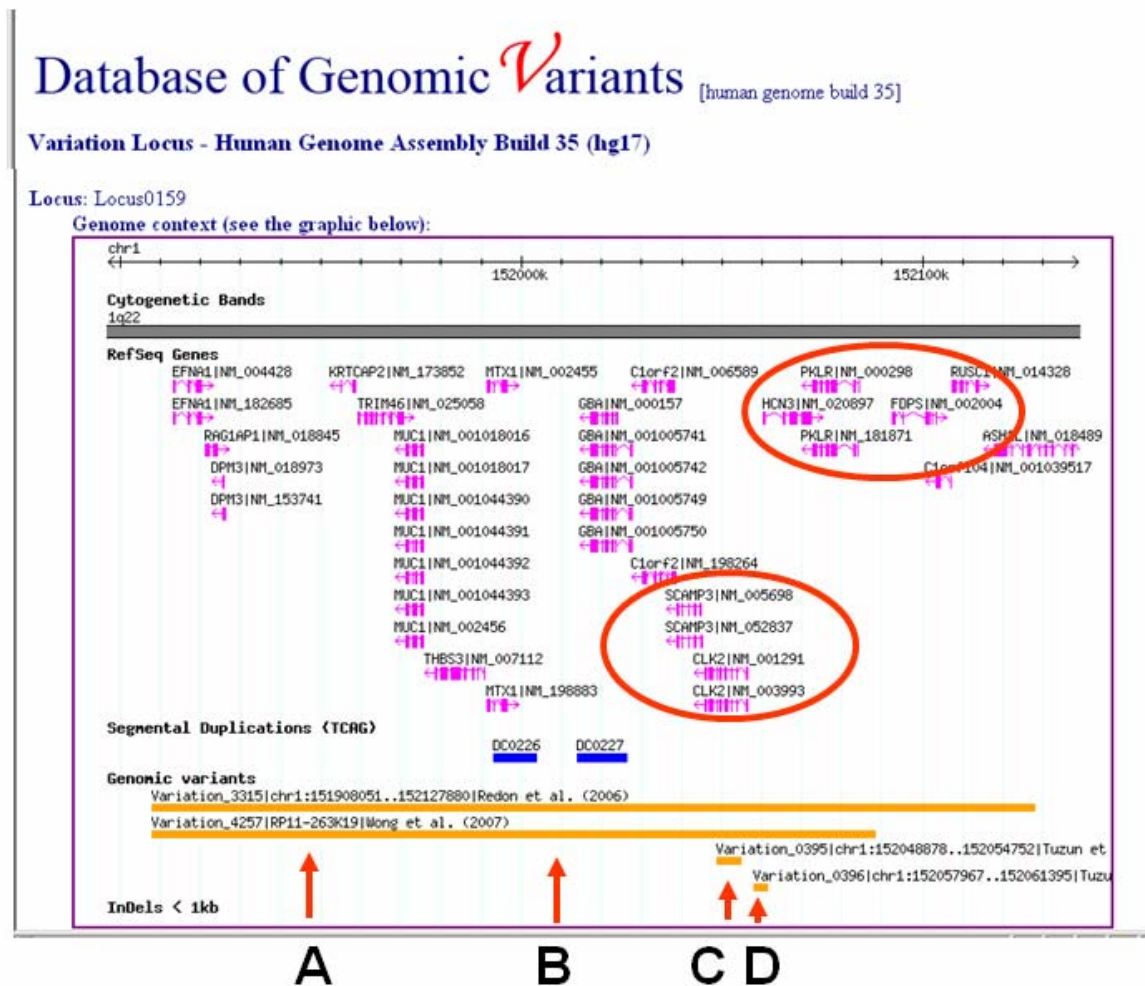

Supplement: jc.2008-2132_1.pdf [file jc.2008-2132_1.pdf]
