# Supplementary material
Source: PubMed Central journal article supplement (PMC2682467)

**Figure 2S:** Copy number polymorphism in chromosome 1q22 region in African American and Caucasians. A) Loss of copy number for primer set A (chr1:153407866-153407975), B) Gain of copy number for primer set B (chr1:153464362-153464455).  $\diamond$ , controls;  $\triangle$  T2DM.

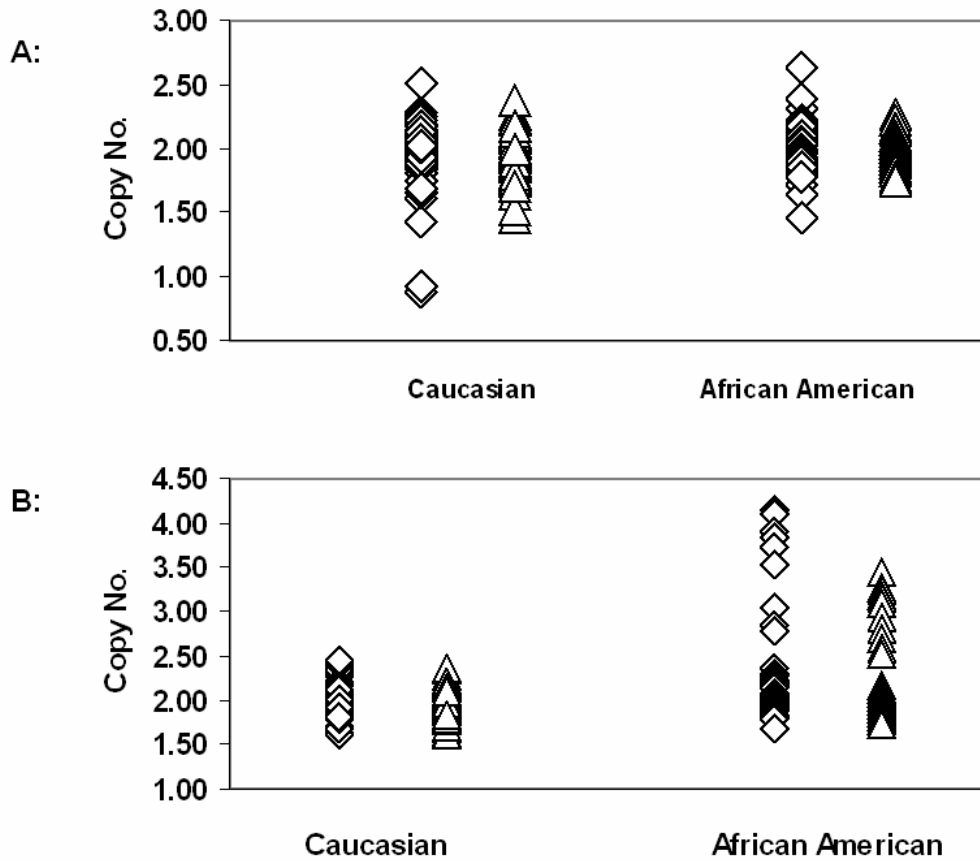

Supplement: jc.2008-2132_2.pdf [file jc.2008-2132_2.pdf]
