# Supplementary material
Source: PubMed Central journal article supplement (PMC2682467)
Supplement: jc.2008-2132_3.pdf [file jc.2008-2132_3.pdf]

**Table 1S: Primer Sequences for Polymorphisms in the PKLR Region**

| POSITION Relative to PKLR | GENE     | RSNUMBER   | UCSC Mar2006 build 126 | Primer direction | Primer sequence                                         |
|---------------------------|----------|------------|------------------------|------------------|---------------------------------------------------------|
| (-)202210                 | ASH1L    | rs1360554  | 153738595              | Forward          | CACGACGTTGTAAAACGACATAGTAAATTAGGACTTGGCTG               |
|                           |          |            |                        | Reverse          | TGCTGCTTAATGTAAATACGGATCTT                              |
|                           |          |            |                        | Sequence         | AATACTGATTATTAAGAGAA                                    |
| (-)162756                 | ASH1L    | rs12724079 | 153700566              | Forward          | CGCCATAGCTTTTGCAGAGT                                    |
|                           |          |            |                        | Reverse          | CACGACGTTGTAAAACGACACATCCTTCCAGGCAGATCTAA               |
|                           |          |            |                        | Sequence         | CTCCATCATGTGACAAAT                                      |
| (-)143582                 | ASH1L    | rs12730906 | 153681392              | Forward          | CACGACGTTGTAAAACGACTTTTTAAATGGTCCTTGCTTTTT              |
|                           |          |            |                        | Reverse          | CACTGACCCTGTTTCATACCAC                                  |
|                           |          |            |                        | Sequence         | AAAATCTTTAAGACCTTGGG                                    |
| (-)142118                 | ASH1L    | rs1325908  | 153679928              | Forward          | CGGTAGTCTAGGACATGATGCTGC                                |
|                           |          |            |                        | Reverse          | CACGACGTTGTAAAACGACCTTCTCTGAGGCTGTGGATGACAG             |
|                           |          |            |                        | Sequence         | TTGAGTTTTGAATAATTTAC                                    |
| (-)141744                 | ASH1L    | rs11264372 | 153679554              | Forward          | TTCACCAAATCACTTTTTATCTCC                                |
|                           |          |            |                        | Reverse          | CACGACGTTGTAAAACGACTGTACCCATTTTAGGATTCTCTTTT            |
|                           |          |            |                        | Sequence         | CATTAACACGTAGTTGAAGA                                    |
| (-)39257                  | ASH1L    | rs12748814 | 153577067              | Forward          | ACAGGCCCACTAAAAGAAGACTCA                                |
|                           |          |            |                        | Reverse          | CACGACGTTGTAAAACGACAGGCTTTTTCTGGTATTTTTTCT              |
|                           |          |            |                        | Sequence         | ACAAAACGTATAATTGGC                                      |
| (-)19401                  | c1orf104 | rs16836822 | 153557211              | C__27848527_10   | CAAAAGCTTAGGATATATCAAACCC[G/T]CTAGGTGGGTGACAAAAGACGCTAA |
| (-)18359                  | FDPS     | rs11264361 | 153556169              | Forward          | CACGACGTTGTAAAACGACGAAGATCCTGCTGGAGATGG                 |
|                           |          |            |                        | Reverse          | GTCCCCAAAGAGGTCAAGGTA                                   |
|                           |          |            |                        | Sequence         | AGCAAAGAGGAAGGATG                                       |
| (-)11643                  | FDPS     | rs11264359 | 153549453              | Forward          | CACGACGTTGTAAAACGACGACAGAGGTCTTCAAAGGCTATTC             |
|                           |          |            |                        | Reverse          | GTGTCAGTGAGCTGCCAGTTTT                                  |
|                           |          |            |                        | Sequence         | GAGCTGCCAGTTTTCAAT                                      |
| (-)8296                   | FDPS     | rs2297480  | 153546106              | C__2737970_10    | AGGGAGGGGCACTCTGGGCTAAGGC[G/T]GGGGTGGGAGTTATCTGGGGAGCTG |
| (-)3774                   | PKLR     | rs12032720 | 153541584              | Forward          | CACGACGTTGTAAAACGACAGATCTGGGGTAATGCACTATCCG             |
|                           |          |            |                        | Reverse          | GAATGGGCAGGGTGTGGT                                      |
|                           |          |            |                        | Sequence         | GGCAGGGTGTGGTA                                          |
| (-)2683                   | PKLR     | rs4971072  | 153540493              | Forward          | CACGACGTTGTAAAACGACGTCGTGGCCATAGTGAAGATA                |
|                           |          |            |                        | Reverse          | CGGGAGGGACCTAAACCAT                                     |
|                           |          |            |                        | Sequence         | TCCATCCCCTGGGTA                                         |
| 1410                      | PKLR     | rs3020781  | 153536400              | Forward          | CCACACAGGGCCTATTGGTA                                    |

| POSITION<br>Relative to<br>PKLR | GENE | RSNUMBER   | UCSC<br>Mar2006<br>build 126 | Primer direction | Primer sequence                               |
|---------------------------------|------|------------|------------------------------|------------------|-----------------------------------------------|
|                                 |      |            |                              | Reverse          | Biotinylated-ACTGATCTACTCCCAGGGCC             |
|                                 |      |            |                              | Sequence         | TTTGACACAGTCATTCATT                           |
| 6009                            | PKLR | rs2071053  | 153531801                    | Forward          | GACACCAAGGGACCGGAGAT                          |
|                                 |      |            |                              | Reverse          | Biotinylated-GATGTGAGTTCTGAGCCCCG             |
|                                 |      |            |                              | Sequence         | CCGGAAAGGCGGC                                 |
| 8573                            | PKLR | rs4620533  | 153529237                    | Forward          | TCCAACCCCATGAAGAACAAT                         |
|                                 |      |            |                              | Reverse          | CACGACGTTGTAAAACGACCCACAGAGCCTACCAATACTGAGG   |
|                                 |      |            |                              | Sequence         | CCTGTTACGAGGAAAGA                             |
| 10803                           | PKLR | rs1052176  | 153527007                    | Forward          | CTGGTGATTGTGGTGACAGG                          |
|                                 |      |            |                              | Reverse          | CACGACGTTGTAAAACGACAGGAAGGGATGGGGTACAAG       |
|                                 |      |            |                              | Sequence         | CGGCTACACCAACATC                              |
| 10836                           | PKLR | rs1052177  | 153526974                    | Forward          | CTGGTGATTGTGGTGACAGG                          |
|                                 |      |            |                              | Reverse          | CACGACGTTGTAAAACGACAGGAAGGGATGGGGTACAAG       |
|                                 |      |            |                              | Sequence         | TATCCTGAGACGCCCTCCC                           |
| 11090                           | PKLR | rs932972   | 153526720                    | Forward          | CACGACGTTGTAAAACGACAAAGACTCAAGGCATCTTAGGG     |
|                                 |      |            |                              | Reverse          | CCATCTCCATTTACACAGGTCC                        |
|                                 |      |            |                              | Sequence         | ACAGCACAATAGTACATTC                           |
| 11863                           | HCN3 | rs8847     | 153525947                    | Forward          | CACGACGTTGTAAAACGACTTGCCCAAACCCATCAGC         |
|                                 |      |            |                              | Reverse          | ATTCCCTTATTCTGCACCAACAGC                      |
|                                 |      |            |                              | Sequence         | AACAAAACCTCTAAAGGTAAG                         |
| 12434                           | HCN3 | rs3814319  | 153525376                    | Forward          | GGTCTGGTTATCTTCTGTTCTG                        |
|                                 |      |            |                              | Reverse          | CACGACGTTGTAAAACGACGGTAAAAGTGGATACCCACACTCAG  |
|                                 |      |            |                              | Sequence         | ATAGCCAGGTACTGCCA                             |
| 13695                           | HCN3 | rs11264355 | 153524116                    | Forward          | GCTGCTCCGGTTCATAGATTATACTACTGACTCCCATCCCCTACC |
|                                 |      |            |                              | Reverse          | TGTACCGGGAGGGAGAAGTTAAG                       |
|                                 |      |            |                              | Sequence         | TGTTGGATATCAAAGAGAATG                         |
| 15280                           | HCN3 | rs11264353 | 113522530                    | RE_Forward       | CCTACTTTGGGGGTCAGCA                           |
|                                 |      |            |                              | RE_Reverse       | CAACCTGGCTGTGCATTAGA                          |
| 15349                           | HCN3 | rs11264352 | 153522461                    | Forward          | CACGACGTTGTAAAACGACCCTCACCGATGGATCCTACTTT     |
|                                 |      |            |                              | Reverse          | AGCTCTGTGATTCTGCAGCGTACT                      |
|                                 |      |            |                              | Sequence         | GTGATTCTGCAGCGTACT                            |
| 15576                           | HCN3 | novel      | 153522688                    | Forward          | CACGACGTTGTAAAACGACCCCTGTCCAGGAGATCATTAA      |
|                                 |      |            |                              | Reverse          | AAAGTAGGATCCATCGGTGAGG                        |
|                                 |      |            |                              | Sequence         | CCCGGCTGGAAGACCTCAA                           |
| 16727                           | HCN3 | novel      | 153521083                    | Forward          | CACGACGTTGTAAAACGACAGTATTCCCATGCCCTGTTCAAG    |

| POSITION<br>Relative to<br>PKLR | GENE | RSNUMBER   | UCSC<br>Mar2006<br>build 126 | Primer direction | Primer sequence                                 |
|---------------------------------|------|------------|------------------------------|------------------|-------------------------------------------------|
|                                 |      |            |                              | Reverse          | TGTCCCTGCTGACCTTCTCC                            |
|                                 |      |            |                              | Sequence         | GGCGTAGCATGTGGCACC                              |
| 17603                           | HCN3 | rs7520184  | 153520207                    | Forward          | CACGACGTTGTAAAACGACTGTGGTTCTGGGCACATGACT        |
|                                 |      |            |                              | Reverse          | GTCATTTGTGTGGAGTTTTGTGGCA                       |
|                                 |      |            |                              | Sequence         | CATGTATAGCTCATGCAAAG                            |
| 22191                           | HCN3 | rs7551854  | 153515621                    | Forward          | CCGGACTTGAGGAAGTTTCTTT                          |
|                                 |      |            |                              | Reverse          | CACGACGTTGTAAAACGACGGAAGTGTGTGAAGCCCTCAT        |
|                                 |      |            |                              | Sequence         | CTCCTGAGTTGACACTGG                              |
| 22611                           | HCN3 | rs7549276  | 153515199                    | Forward          | CACGACGTTGTAAAACGACGGAGCCTCGAAATACAGTTGT        |
|                                 |      |            |                              | Reverse          | GAGAGTGAGATCCACAGGAGACTA                        |
|                                 |      |            |                              | Sequence         | TGGGAACGAGGCAGCAA                               |
| 23073                           | HCN3 | rs11264349 | 153514737                    | Forward          | CACGACGTTGTAAAACGACAAGTATCGGGGCCAGTCTGA         |
|                                 |      |            |                              | Reverse          | CTTCACCACTAGGGACAGCG                            |
|                                 |      |            |                              | Sequence         | TTTTTCCTGGTAGTCTGT                              |
| 23479                           | HCN3 | rs12749306 | 153514331                    | Forward          | CACGACGTTGTAAAACGACGGAGGGCAGGGTACATCAAT         |
|                                 |      |            |                              | Reverse          | GCTAGACTGGTGCAAGTACTCTC                         |
|                                 |      |            |                              | Sequence         | GTCCCGGTGTCGCTG                                 |
| 23599                           | HCN3 | novel      | 153514211                    | Forward          | GCTGCTCCGGTTCATAGATTGGTACCTGATGGCAACAG          |
|                                 |      |            |                              | Reverse          | AATACCGGAAGTCGCTGTAG                            |
|                                 |      |            |                              | Sequence         | CTCCTGCTCGATTTCCACTG                            |
| 27094                           | CLK2 | rs12563994 | 153510716                    | Forward          | CACGACGTTGTAAAACGACAGTGCAATGGCCCGATCT           |
|                                 |      |            |                              | Reverse          | GGTGGCTTACATAATGTGTGA                           |
|                                 |      |            |                              | Sequence         | AGGTAGGAGAATCGCTTGAAC                           |
| 29825                           | CLK2 | rs2236863  | 153507985                    | Forward          | TTCTATCCTTATTTTCTTCAAACACAGC                    |
|                                 |      |            |                              | Reverse          | TCTGCTGCTCCGGTTCATAGATTTGGCAGTCTCCATCGGTCGTC    |
|                                 |      |            |                              | Sequence         | TTGAAACACAGCTCCATGAA                            |
| 31562                           | CLK2 | rs2361543  | 153506248                    | Forward          | ACCTGTGACAAGGTCCTGCCTTA                         |
|                                 |      |            |                              | Reverse          | TCTGCTGCTCCGGTTCATAGATTTGCCTTTTCAGAGGTTTTGGTGAC |
|                                 |      |            |                              | Sequence         | GCTAAGAAAAACTGTTCTCA                            |
| 33982                           | CLK2 | rs4971070  | 153503828                    | Forward          | CGGATTTAGGATGGACAGTTTGATGATT                    |
|                                 |      |            |                              | Reverse          | CACGACGTTGTAAAACGACCCAGCCCAAGTTTCAAATATCT       |
|                                 |      |            |                              | Sequence         | GTTTTTGAAGTATTTAGAATGA                          |
| 34353                           | CLK2 | novel      | 153503457                    | Forward          | TGGTAGAGGCTACTCCTTA                             |
|                                 |      |            |                              | Reverse          | TGGTAGAGGCTACTCCTTA                             |
|                                 |      |            |                              | Sequence         | TTAGTACCATTCTTCTTGGGTCT                         |

| POSITION<br>Relative to<br>PKLR | GENE   | RSNUMBER  | UCSC<br>Mar2006<br>build 126 | Primer direction | Primer sequence                              |
|---------------------------------|--------|-----------|------------------------------|------------------|----------------------------------------------|
| 35693                           | CLK2   | rs1078699 | 153502117                    | Forward          | CACGACGTTGTAAAACGACGAAAGTTATCTGAAGTCCCCTGT   |
|                                 |        |           |                              | Reverse          | TCCTCCCACATTTTCTCCCTGTCTG                    |
|                                 |        |           |                              | Sequence         | TAAATAGGTTGAAAGCGAGA                         |
| 36365                           | CLK2   | rs1076556 | 153501445                    | Forward          | GCCTTCCAAGCCCTGG                             |
|                                 |        |           |                              | Reverse          | CACGACGTTGTAAAACGACCATATTTTTAGAGAAACTCCTTTGC |
|                                 |        |           |                              | Sequence         | GAAGACTACACTCAAGTGCC                         |
| 37782                           | CLK2   | novel     | 153500028                    | GEL-Forward      | GCCCCGCCGCAGAGATCAAAGCAATGTCCTGGATTC         |
|                                 |        |           |                              | GEL-Reverse      | C GACTGATATCCCGACTGGAG                       |
| 39112                           | SCAMP3 | rs1046188 | 153498698                    | RE-Forward       | TCCATCTCGGGAGACTAGGAAG                       |
|                                 |        |           |                              | RE-Reverse       | ACCTCAAATCCATCATCCAACACTGC                   |
| 39641                           | SCAMP3 | rs2242576 | 153498169                    | RE-Forward       | TTGTGACATTTGATCCTGGGAAGAGCC                  |
|                                 |        |           |                              | RE-Reverse       | CTCCAACCAGCCCCAACCT                          |
| 40754                           | SCAMP3 | novel     | 153494076                    | Forward          | ATTCCTGTGTTATGAGGGACTAGATG                   |
|                                 |        |           |                              | Reverse          | CACGACGTTGTAAAACGACCCTGAGTGCTGTATGAGCCATAGTT |
|                                 |        |           |                              | Sequence         | CAGCCACCACCAGCCTAT                           |
| 41055                           | SCAMP3 | rs3180018 | 153496775                    | Forward          | AGTTGGACCGAAGGGAGCGAGA                       |
|                                 |        |           |                              | Reverse          | CACGACGTTGTAAAACGACCACCCAGCCGAGCCCAGG        |
|                                 |        |           |                              | Sequence         | CTGCAGCATGTTGCCATGGG                         |
| 45338                           | SCAMP3 | novel     | 153489492                    | Forward          | TCCTCCGTAGTGCTCCCAATCCTAT                    |
|                                 |        |           |                              | Reverse          | CACGACGTTGTAAAACGACGAAGCAACAGCCGTGGCACA      |
|                                 |        |           |                              | Sequence         | CACCTCTCACACGCC                              |
| 46885                           | C1ORF2 | rs2242577 | 153490925                    | Forward          | CACGACGTTGTAAAACGACGACACAATGCCAACCACCC       |
|                                 |        |           |                              | Reverse          | ACTCCTGGTCTCTGCCTCCTTA                       |
|                                 |        |           |                              | Sequence         | TGCATCCTGTGGTGAGGG                           |

Primer sequences are provided for amplification and sequencing primers. Unless otherwise noted, assays were performed by Pyrosequencing. Other assays were restriction digest (RE) or size separation on sodium dodecyl sulfate/polyacrylamide gels (GEL). Primers assayed by Taqman used Assay by Design (Applied Biosystems, Inc); sequence of polymorphism is provided.
