# Supplementary material
Source: PubMed Central journal article supplement (PMC2682467)
Supplement: jc.2008-2132_4.pdf [file jc.2008-2132_4.pdf]

**Table 2S: Summary of Single Nucleotide Polymorphisms and Insertion/Deletion Variants in the PKLR Region**

| GENE     | LOCATION  | RS NUMBER  | UCSC Mar2006 build 126 | VARIATION            | EUROPEAN AMERICAN |          |         | AFRICAN AMERICAN |          |                     |
|----------|-----------|------------|------------------------|----------------------|-------------------|----------|---------|------------------|----------|---------------------|
|          |           |            |                        |                      | CASES             | CONTROLS | P-VALUE | CASES            | CONTROLS | P-VALUE             |
| ASH1L    | Intron 2  | rs1360554  | 153738595              | A/G                  | 0.30              | 0.31     | 0.6     | 0.23             | 0.26     | Pool                |
| ASH1L    | Intron 3  | rs12724079 | 153700566              | C/T                  | 0.35              | 0.31     | 0.3     | ---              | ---      | ---                 |
| ASH1L    | Intron 4  | rs12730906 | 153681392              | C/T                  | 0.18              | 0.13     | 0.05    | ---              | ---      | ---                 |
| ASH1L    | Intron 4  | rs1325908  | 153679928              | G/T                  | 0.30              | 0.28     | 0.45    | 0.19             | 0.20     | ---                 |
| ASH1L    | Intron 4  | rs11264372 | 153679554              | A/G                  | 0.25              | 0.22     | 0.34    | ND               | ND       | ND                  |
| ASH1L    | Intron 25 | rs12748814 | 153577067              | C/T                  | 0.09              | 0.06     | 0.17    | ND               | ND       | ND                  |
| RUSC1    | 3'UTR     | Novel      | 153567262              | A/G                  | ND                | ND       | ND      | <2%              | <2%      | <2%                 |
| RUSC1    | 3'UTR     | Novel      | 153567180              | A/C                  | ND                | ND       | ND      | <2%              | <2%      | <2%                 |
| RUSC1    | 3'UTR     | Novel      | 153567004              | G/A                  | <2%               | <2%      | <2%     | ND               | ND       | ND                  |
| RUSC1    | Intron 7  | Novel      | 153565160              | 13 bp deletion       | ND                | ND       | ND      | <2%              | <2%      | <2%                 |
| RUSC1    | Intron 6  | Novel      | 153563809              | G/T                  | ND                | ND       | ND      | <2%              | <2%      | <2%                 |
| RUSC1    | Intron 5  | Novel      | 153562969              | G/A                  | ND                | ND       | ND      | <2%              | <2%      | <2%                 |
| RUSC1    | Intron 4  | Novel      | 153562191              | C deletion           | ND                | ND       | ND      | <4%              | <4%      | <4%                 |
| RUSC1    | Exon 2    | Novel      | 153561470              | CCC(pro)20/CCT(Pro)  | <2%               | <2%      | <2%     | ND               | ND       | ND                  |
| RUSC1    | Exon 2    | rs35826120 | 153561538              | TCT(Ser)8/CCT(Leu)   | <2%               | <2%      | <2%     | ND               | ND       | ND                  |
| RUSC1    | Intron 1  | rs4971075  | 153561396              | A/G                  | LD*               | LD*      | LD*     | LD*              | LD*      | LD*                 |
| c1orf104 | Exon 2    | Novel      | 153557674              | GTG(Val)76/ATG(Met)  | ND                | ND       | ND      | <2%              | <2%      | <2%                 |
| c1orf104 | Exon 2    | rs16836822 | 153557211              | GAG(Ser)231/GCG(Arg) | ND                | ND       | ND      | 0.08             | 0.03     | 0.0023 (not in HWE) |
| FDPS     | Exon 11   | rs41314549 | 153556855              | GTG(Val)342/CGC(Ala) | <2%               | <2%      | <2%     | ND               | ND       | ND                  |
| FDPS     | Intron 9  | rs11264361 | 153556169              | G/T                  | 0.28              | 0.20     | 0.014   | 0.22             | 0.27     | 0.039               |
| FDPS     | Exon 9    | Novel      | 153556089              | TTC(Leu)269/GTC(Val) | ND                | ND       | ND      | <2%              | <2%      | <2%                 |
| FDPS     | Intron 7  | Novel      | 153555245              | G deletion           | ND                | ND       | ND      | <2%              | <2%      | <2%                 |
| FDPS     | Intron 6  | rs34961293 | 153554808              | C/T                  | ND                | ND       | ND      | ND               | ND       | ND                  |
| FDPS     | Intron 5  | Novel      | 153554133              | C/T                  | <2%               | <2%      | <2%     | ND               | ND       | ND                  |
| FDPS     | Intron 5  | rs1409140  | 153554230              | C/T                  | ND                | ND       | ND      | ND               | ND       | ND                  |
| FDPS     | Intron 4  | rs17367421 | 153553865              | C/G                  | ND                | ND       | ND      | ND               | ND       | ND                  |
| FDPS     | Intron 4  | Novel      | 153550112              | T/C                  | ND                | ND       | ND      | <4%              | <4%      | <4%                 |
| FDPS     | Intron 4  | Novel      | 153549913              | T deletion           | ND                | ND       | ND      | <2%              | <2%      | <2%                 |
| FDPS     | intron 4  | rs11264359 | 153549453              | A/G                  | 0.29              | 0.22     | 0.045   | 0.37             | 0.35     | 0.7                 |
| FDPS     | Ex 3      | Novel      | 153546470              | CTC(Leu)63/TTC(Cys)  | <2%               | <2%      | <2%     | ND               | ND       | ND                  |
| FDPS     | intron 1  | rs2297480  | 153546106              | A/C                  | 0.2769            | 0.1989   | 0.01    | 0.2827           | 0.3343   | 0.09                |
| PKLR     | Promotor  | rs12032720 | 153541584              | C/G                  | 0.29              | 0.22     | 0.03    | 0.37             | 0.42     | 0.036               |

| GENE | LOCATION     | RS NUMBER  | UCSC Mar2006 build 126 | VARIATION            | EUROPEAN AMERICAN |          |         | AFRICAN AMERICAN |          |         |
|------|--------------|------------|------------------------|----------------------|-------------------|----------|---------|------------------|----------|---------|
|      |              |            |                        |                      | CASES             | CONTROLS | P-VALUE | CASES            | CONTROLS | P-VALUE |
| PKLR | Promotor     | rs4971072  | 153540493              | A/G                  | 0.34              | 0.23     | 0.10    | ND               | ND       | ND      |
| PKLR | Intron 3     | rs3020781  | 153536400              | C/T                  | 0.29              | 0.22     | 0.02    | 0.42             | 0.38     | 0.25    |
| PKLR | Intron 5     | rs2071053  | 153531801              | C/T                  | 0.30              | 0.22     | 0.01    | 0.41             | 0.37     | 0.21    |
| PKLR | Intron 10    | rs4620533  | 153529237              | C/G                  | 0.29              | 0.22     | 0.022   | 0.45             | 0.40     | 0.13    |
| PKLR | Exon 12      | rs1052176  | 153527007              | C/T                  | 0.30              | 0.21     | 0.007   | 0.32             | 0.29     | Pool    |
| PKLR | 3' UTR       | rs1052177  | 153526974              | A/C                  | 0.30              | 0.21     | 0.007   | 0.49             | 0.48     | 0.30    |
| PKLR | 3' UTR       | rs932972   | 153526720              | C/T                  | 0.29              | 0.21     | 0.012   | 0.47             | 0.45     | Pool    |
| HCN3 | 3' UTR       | novel      | 153525953              | C/A                  | ND                | ND       | ND      | <2%              | <2%      | <2%     |
| HCN3 | 3' UTR       | rs8847     | 153525947              | C/T                  | 0.28              | 0.22     | 0.08    | 0.46             | 0.46     | 0.9     |
| HCN3 | 3' UTR       | rs3814318  | 153525380              | A/G                  | LD*               | LD*      | LD*     | LD*              | LD*      | LD*     |
| HCN3 | 3' UTR       | rs3814319  | 153525376              | C/T                  | 0.34              | 0.28     | 0.06    | 0.35             | 0.32     | 0.5     |
| HCN3 | 3' UTR       | rs12118947 | 153525072              | A/G                  | <2%               | <2%      | <2%     | ND               | ND       | ND      |
| HCN3 | Exon 8       | novel      | 153524232              | GAG(Glu)560/AAG(Lys) | ND                | ND       | ND      | <1%              | <1%      | <1%     |
| HCN3 | Intron 7     | rs11264355 | 153524116              | C/G                  | 0.30              | 0.22     | 0.02    | 0.50             | 0.47     | Pool    |
| HCN3 | Intron 6     | novel      | 153524863              | T/C                  | ND                | ND       | ND      | <2%              | <2%      | <2%     |
| HCN3 | Intron 6     | novel      | 153525265              | G/C                  | ND                | ND       | ND      | <2%              | <2%      | <2%     |
| HCN3 | Intron 6     | rs11264353 | 113522530              | G/C                  | 0.30              | 0.19     | 0.004   | 0.49             | 0.53     | 0.10    |
| HCN3 | Intron 6     | rs11264352 | 153522461              | T/C                  | 0.30              | 0.23     | 0.030   | 0.49             | 0.45     | 0.29    |
| HCN3 | Exon 6       | novel      | 153522639              | GUG(Val)461/AUG(Met) | ND                | ND       | ND      | <2%              | <2%      | <2%     |
| HCN3 | Exon 6       | novel      | 153522688              | CTG(Leu)444/CTT(Leu) | ND                | ND       | ND      | 0.12             | 0.12     | 0.80    |
| HCN3 | Intron 5     | novel      | 153521829              | C/T                  | <2%               | <2%      | <2%     | ND               | ND       | ND      |
| HCN3 | Exon 4       | novel      | 153521083              | GUA(Val)334/AUA(Ile) | ND                | ND       | ND      | 0.02             | 0.02     | 0.72    |
| HCN3 | Intron 2     | novel      | 153520330              | G/T                  | <2%               | <2%      | <2%     | ND               | ND       | ND      |
| HCN3 | Intron 2     | rs7520184  | 153520207              | A/G                  | 0.29              | 0.22     | 0.025   | 0.48             | 0.49     | 0.29    |
| HCN3 | Intron 2     | rs12049375 | 153519457              | A/G                  | LD*               | LD*      | LD*     | LD*              | LD*      | LD*     |
| HCN3 | Intron 1     | rs7551854  | 153515621              | G/T                  | ND                | ND       | ND      | 0.10             | 0.09     | Pool    |
| HCN3 | Intron 1     | rs7549276  | 153515199              | G/A                  | 0.25              | 0.35     | Pool    | 0.43             | 0.40     | Pool    |
| HCN3 | Intron 1     | rs11264349 | 153514737              | A/T                  | 0.30              | 0.22     | 0.014   | 0.30             | 0.35     | 0.07    |
| HCN3 | Intron 1     | rs12749306 | 153514331              | G/T                  | 0.30              | 0.22     | 0.014   | 0.33             | 0.36     | 0.2     |
| HCN3 | Exon 1       | novel      | 153514211              | AAA(Lys)69/AGA(Arg)  | 0.02              | 0.02     | 0.7     | ND               | ND       | ND      |
| CLK2 | Exon 1 (UTR) | novel      | 153514000              | G/C                  | ND                | ND       | ND      | <2%              | <2%      | <2%     |
| CLK2 | Exon 1 (UTR) | rs12563994 | 153510716              | G/A                  | 0.30              | 0.23     | 0.046   | 0.46             | 0.43     | 0.37    |
| CLK2 | Exon 1 (UTR) | novel      | 153509850              | G/C                  | ND                | ND       | ND      | <1%              | <1%      | <1%     |
| CLK2 | Intron 1     | novel      | 153507978              | T/G                  | ND                | ND       | ND      | <1%              | <1%      | <1%     |
| CLK2 | Intron 1     | rs2236863  | 153507985              | C/T                  | 0.30              | 0.22     | 0.013   | 0.45             | 0.43     | 0.51    |
| CLK2 | Exon 2       | rs12749700 | 153507338              | CGU(Arg)19/AGU(Ser)  | <1%               | <1%      | <1%     | ND               | ND       | ND      |

| GENE   | LOCATION    | RS NUMBER | UCSC Mar2006 build 126 | VARIATION            | EUROPEAN AMERICAN |          |         | AFRICAN AMERICAN |          |         |
|--------|-------------|-----------|------------------------|----------------------|-------------------|----------|---------|------------------|----------|---------|
|        |             |           |                        |                      | CASES             | CONTROLS | P-VALUE | CASES            | CONTROLS | P-VALUE |
| CLK2   | Intron 2    | rs2361543 | 153506248              | C/T                  | 0.28              | 0.21     | 0.017   | 0.41             | 0.41     | Pool    |
| CLK2   | Intron 5    | novel     | 153504671              | G/C                  | ND                | ND       | ND      | <1%              | <1%      | <1%     |
| CLK2   | Intron 6    | rs4971070 | 153503828              | C/T                  | 0.05              | 0.05     | 0.97    | ND               | ND       | ND      |
| CLK2   | Intron 6    | novel     | 153503494              | G/A                  | <1%               | <1%      | <1%     | ND               | ND       | ND      |
| CLK2   | Intron 6    | novel     | 153503457              | C/T                  | ND                | ND       | ND      | 0.11             | 0.11     | 0.76    |
| CLK2   | Intron 8    | rs1078699 | 153502117              | A/G                  | 0.28              | 0.23     | 0.078   | 0.38             | 0.35     | 0.36    |
| CLK2   | Intron 8    | rs1076556 | 153501445              | C/T                  | 0.10              | 0.08     | 0.35    | 0.40             | 0.37     | 0.32    |
| CLK2   | Intron 8    | novel     | 153501241              | T/A                  | ND                | ND       | ND      | <1%              | <1%      | <1%     |
| CLK2   | Intron 11   | novel     | 153500028              | [AAAG] ins/del       | ND                | ND       | ND      | 0.07             | 0.07     | 0.87    |
| SCAMP3 | 5' Flanking | novel     | 153498979              | [AG] ins/del         | ND                | ND       | ND      | <1%              | <1%      | <1%     |
| SCAMP3 | 5' Flanking | rs1046188 | 153498698              | A/G                  | 0.30              | 0.23     | 0.035   | 0.47             | 0.48     | 0.79    |
| SCAMP3 | Intron 1    | rs2242576 | 153498169              | A/C                  | LD*               | LD*      | LD*     | 0.40             | 0.40     | 1.00    |
| SCAMP3 | Exon 3      | novel     | 153494076              | CCT(Pro)55/TCT(Ser)  | 0.02              | 0.01     | 0.10    | ND               | ND       | ND      |
| SCAMP3 | Exon 4      | rs3180018 | 153496775              | GGA(Gly)126/GGG(Gly) | 0.29              | 0.22     | 0.017   | 0.44             | 0.48     | 0.22    |
| SCAMP3 | 3' UTR      | novel     | 153489492              | C/T                  | 0.01              | 0.01     | 0.68    | ND               | ND       | ND      |
| SCAMP3 | 3' UTR      | novel     | 153489193              | A/G                  | ND                | ND       | ND      | <2%              | <2%      | <2%     |
| SCAMP3 | 3' UTR      | novel     | 153488979              | A/G                  | ND                | ND       | ND      | <1%              | <1%      | <1%     |
| C1ORF2 | Intron 1    | rs2242577 | 153490925              | A/C                  | 0.28              | 0.22     | 0.04    | 0.40             | 0.38     | 0.56    |
| C1ORF2 | Intron 5    | rs2072647 | 153488461              | G/T                  | 0.28              | 0.22     | 0.0639  | 0.37             | 0.37     | 0.736   |

ND, not detected in this population; Pool, allele frequencies determined in pooled samples with no p value calculated; \* = in LD with another typed SNPs and not individually typed. Frequencies shown as less than a percentage were observed in only 1 or two alleles in the screening set and not typed in the full set. P values represent allelic tests of association with type 2 diabetes.
